# Supplementary material
Source: ML conference proceedings conference paper supplement (https://proceedings.neurips.cc/paper_files/paper/2014/hash/f09696910bdd874a99cd74c8f05b5c44-Abstract.html)
Supplement: Supplementary file [file f09696910bdd874a99cd74c8f05b5c44-Supplemental.zip]

---

# Supplementary materials for *A Differential Equation for Modeling Nesterov's Accelerated Gradient Method: Theory and Insights*

---

**WeiJie Su**  
 Department of Statistics  
 Stanford University  
 Stanford, CA 94305  
 wjsu@stanford.edu

**Stephen Boyd**  
 Department of Electrical Engineering  
 Stanford University  
 Stanford, CA 94305  
 boyd@stanford.edu

**Emmanuel J. Candès**  
 Departments of Statistics and of Mathematics  
 Stanford University  
 Stanford, CA 94305  
 candes@stanford.edu

## 1 Proof of Theorem 2.1

The proof is divided into two parts, namely, existence and uniqueness.

### 1.1 Existence

In this section we aim to prove

**Lemma 1.1.** *For any  $f \in \mathcal{F}_\infty(\mathbb{R}^n)$  and any  $x_0 \in \mathbb{R}^n$ , ODE (1.2) with initial conditions  $X(0) = x_0, \dot{X}(0) = 0$  has at least one solution  $X$  in  $C^2(0, \infty) \cap C^1[0, \infty)$ . Recall  $C^2(0, \infty)$  is the set of functions, taking values in  $\mathbb{R}^n$ , defined on  $[0, \infty)$  and twice continuously differentiable on  $(0, \infty)$ . Similarly  $C^1[0, \infty)$  is the set of continuously differentiable functions from  $[0, \infty)$  to  $\mathbb{R}^n$ .*

To begin with, for any  $\delta > 0$  consider the smoothed ODE

$$\ddot{X} + \frac{3}{\max(\delta, t)} \dot{X} + \nabla f(X) = 0 \quad (1)$$

with  $X(0) = x_0, \dot{X}(0) = 0$ . Denoting by  $Z = \dot{X}$ , then (1) is equivalent to

$$\frac{d}{dt} \begin{pmatrix} X \\ Z \end{pmatrix} = \begin{pmatrix} Z \\ -\frac{3}{\max(\delta, t)} Z - \nabla f(X) \end{pmatrix}.$$

As functions of  $(X, Z)$ , both  $(Z$  and  $-3Z/\max(\delta, t) - \nabla f(X))$  are Lipschitz continuous with constant at most  $\max(1, L) + 3/\delta$ . Hence by standard ODE theory (1) has a unique global solution in  $C^2[0, \infty)$ , which is denoted by  $X_\delta$ . Note that  $\ddot{X}_\delta$  is also well defined at  $t = 0$ . Next, introduce  $M_\delta(t)$  to be the supremum of  $\|\dot{X}_\delta(u)\|/u$  over  $u \in (0, t]$ . We remark that  $M_\delta(t)$  is finite because  $\|\dot{X}_\delta(u)\|/u = (\|\dot{X}_\delta(u) - \dot{X}_\delta(0)\|)/u = \|\ddot{X}_\delta(0)\| + o(1)$  for  $u = o(1)$ . We given an upper bound for  $M_\delta(t)$  in the following lemma.

**Lemma 1.2.** *For  $\delta < \sqrt{6/L}$  one has*

$$M_\delta(\delta) \leq \frac{\|\nabla f(x_0)\|}{1 - L\delta^2/6}.$$

The proof of Lemma 1.2 relies on a simple lemma.

**Lemma 1.3.** *For any  $u > 0$ , the following inequality holds*

$$\|\nabla f(X_\delta(u)) - \nabla f(x_0)\| \leq \frac{1}{2}LM_\delta(u)u^2.$$

*Proof of Lemma 1.3.* By Lipschitz continuity,

$$\|\nabla f(X_\delta(u)) - \nabla f(x_0)\| \leq L\|X_\delta(u) - x_0\| = \left\| \int_0^u \dot{X}_\delta(v) dv \right\| \leq \int_0^u v \frac{\|\dot{X}_\delta(v)\|}{v} dv \leq \frac{1}{2}LM_\delta(u)u^2.$$

□

*Proof of Lemma 1.2.* For  $0 < t \leq \delta$ , the smoothed ODE reads

$$\ddot{X}_\delta + \frac{3}{\delta}\dot{X}_\delta + \nabla f(X_\delta) = 0,$$

which yields

$$\dot{X}_\delta e^{3t/\delta} = - \int_0^t \nabla f(X_\delta(u)) e^{3u/\delta} du = -\nabla f(x_0) \int_0^t e^{3u/\delta} du - \int_0^t (\nabla f(X_\delta(u)) - \nabla f(x_0)) e^{3u/\delta} du.$$

Hence, by Lemma 1.3

$$\begin{aligned} \frac{\|\dot{X}_\delta(t)\|}{t} &\leq \frac{1}{t} e^{-3t/\delta} \|\nabla f(x_0)\| \int_0^t e^{3u/\delta} du + \frac{1}{t} e^{-3t/\delta} \int_0^t \frac{1}{2} LM_\delta(u) u^2 e^{3u/\delta} du \\ &\leq \|\nabla f(x_0)\| + \frac{LM_\delta(\delta)\delta^2}{6}. \end{aligned}$$

Taking the supremum of  $\|\dot{X}_\delta(t)\|/t$  over  $0 < t \leq \delta$  and rearranging the inequality give the desired result. □

Next, we give an upper bound for  $M_\delta(t)$  with  $t > \delta$ .

**Lemma 1.4.** *For  $\delta < \sqrt{6/L}$  and  $\delta < t < \sqrt{12/L}$ , one has*

$$M_\delta(t) \leq \frac{(5 - L\delta^2/6)\|\nabla f(x_0)\|}{4(1 - L\delta^2/6)(1 - Lt^2/12)}.$$

*Proof of Lemma 1.4.* When  $t > \delta$  the smoothed ODE reads

$$\ddot{X}_\delta + \frac{3}{t}\dot{X}_\delta + \nabla f(X_\delta) = 0,$$

which is equivalent to

$$\frac{dt^3 \dot{X}_\delta(t)}{dt} = -t^3 \nabla f(X_\delta(t)).$$

By integration,

$$t^3 \dot{X}_\delta(t) = - \int_\delta^t u^3 \nabla f(X_\delta(u)) du + \delta^3 \dot{X}_\delta(\delta) = - \int_\delta^t u^3 \nabla f(x_0) du - \int_\delta^t u^3 (\nabla f(X_\delta(u)) - \nabla f(x_0)) du + \delta^3 \dot{X}_\delta(\delta).$$

Therefore by Lemmas 1.3 and 1.2 we have

$$\begin{aligned} \frac{\|\dot{X}_\delta(t)\|}{t} &\leq \frac{t^4 - \delta^4}{4t^4} \|\nabla f(x_0)\| + \frac{1}{t^4} \int_\delta^t \frac{1}{2} LM_\delta(u) u^5 du + \frac{\delta^4}{t^4} \frac{\|\dot{X}_\delta(\delta)\|}{\delta} \\ &\leq \frac{1}{4} \|\nabla f(x_0)\| + \frac{1}{12} LM_\delta(t) t^2 + \frac{\|\nabla f(x_0)\|}{1 - L\delta^2/6}, \end{aligned}$$

where the last expression is an increasing function of  $t$ . So for any  $\delta < t' < t$ , it follows that

$$\frac{\|\dot{X}_\delta(t')\|}{t'} \leq \frac{1}{4} \|\nabla f(x_0)\| + \frac{1}{12} LM_\delta(t) t^2 + \frac{\|\nabla f(x_0)\|}{1 - L\delta^2/6},$$

which also holds for  $t' \leq \delta$ . Taking the supremum over  $t' \in (0, t)$  gives

$$M_\delta(t) \leq \frac{1}{4} \|\nabla f(x_0)\| + \frac{1}{12} L M_\delta(t) t^2 + \frac{\|\nabla f(X_0)\|}{1 - L\delta^2/6}.$$

The desired result follows from rearranging the inequality.  $\square$

**Lemma 1.5.** *Consider the set of continuous functions  $\mathcal{F} = \{X_\delta : [0, \sqrt{6/L}] \rightarrow \mathbb{R}^n \mid \delta = \sqrt{3/L}/2^m, m = 0, 1, \dots\}$  is uniformly bounded and equicontinuous.*

*Proof of Lemma 1.5.* By Lemmas 1.2 and 1.4, for any  $t \in [0, \sqrt{6/L}]$ ,  $\delta \in (0, \sqrt{3/L})$  the gradient is uniformly bounded by

$$\|\dot{X}_\delta(t)\| \leq \sqrt{6/L} M_\delta(\sqrt{6/L}) \leq \sqrt{6/L} \max \left\{ \frac{\|\nabla f(x_0)\|}{1 - \frac{1}{2}}, \frac{5\|\nabla f(x_0)\|}{4(1 - \frac{1}{2})(1 - \frac{1}{2})} \right\} = 5\sqrt{6/L} \|\nabla f(x_0)\|.$$

Thus it immediately implies that  $\mathcal{F}$  is equicontinuous. To establish the uniform boundedness, note that

$$\|X_\delta(t)\| \leq \|X_\delta(0)\| + \int_0^t \|\dot{X}_\delta(u)\| du \leq \|x_0\| + 30\|\nabla f(x_0)\|/L.$$

$\square$

Now it is ready to give

*Proof of Lemma 1.1.* By the Arzelà–Ascoli theorem and Lemma 1.5,  $\mathcal{F}$  contains a sequence converge uniformly on  $[0, \sqrt{6/L}]$ . Denote by  $\{X_{\delta_{m_i}}\}_{i \in \mathbb{N}}$  the convergent sequence and  $\check{X}$  the limit. Above,  $\delta_{m_i} = \sqrt{3/L}/2^{m_i}$  decreases as  $i$  increases. We will prove that  $\check{X}$  satisfies (1.2) and the initial conditions  $\check{X}(0) = x_0$ ,  $\dot{\check{X}}(0) = 0$ .

Fix an arbitrary  $t_0 \in (0, \sqrt{6/L})$ . Since  $\|\dot{X}_{\delta_{m_i}}(t_0)\|$  is bounded, we can pick a subsequence of  $\dot{X}_{\delta_{m_i}}(t_0)$  which converges to a limit denoted by  $X_{t_0}^D$ . Without loss of generality, assume the subsequence is the original sequence. Denote by  $\tilde{X}$  the local solution to (1.2) with  $X(t_0) = \tilde{X}(t_0)$  and  $\dot{X}(t_0) = X_{t_0}^D$ . On the other hand, recall  $X_{\delta_{m_i}}$  is the solution to (1.2) with  $X(t_0) = X_{\delta_{m_i}}(t_0)$  and  $\dot{X}(t_0) = \dot{X}_{\delta_{m_i}}(t_0)$  when  $\delta_{m_i} < t_0$ . Since both  $X_{\delta_{m_i}}(t_0)$  and  $\dot{X}_{\delta_{m_i}}(t_0)$  go to  $\tilde{X}(t_0)$  and  $X_{t_0}^D$ , respectively, there exists  $\epsilon_0 > 0$  such that

$$\sup_{t \in (t_0 - \epsilon_0, t_0 + \epsilon_0)} \|X_{\delta_{m_i}}(t) - \tilde{X}(t)\| \rightarrow 0$$

as  $i \rightarrow \infty$ . However, by definition we have

$$\sup_{t \in (t_0 - \epsilon_0, t_0 + \epsilon_0)} \|X_{\delta_{m_i}}(t) - \check{X}(t)\| \rightarrow 0.$$

Therefore  $\check{X}$  and  $\tilde{X}$  have to be identical on  $(t_0 - \epsilon_0, t_0 + \epsilon_0)$ . So  $\check{X}$  satisfies (1.2) at  $t_0$ . Since  $t_0$  is arbitrary, we conclude that  $\check{X}$  is a solution to (1.2) on  $(0, \sqrt{6/L})$ . By extension,  $\check{X}$  can be a global solution to (1.2) on  $(0, \infty)$ . It only leaves to verify the initial conditions to complete the proof.

The first condition  $\check{X}(0) = x_0$  is a direct consequence of  $X_{\delta_{m_i}}(0) = x_0$ . To check the second one, pick a small  $t > 0$  and note that

$$\frac{\|\check{X}(t) - \check{X}(0)\|}{t} = \lim_{i \rightarrow \infty} \frac{\|X_{\delta_{m_i}}(t) - X_{\delta_{m_i}}(0)\|}{t} = \lim_{i \rightarrow \infty} \|\dot{X}_{\delta_{m_i}}(\xi_i)\| \leq \limsup_{i \rightarrow \infty} t M_{\delta_{m_i}}(t) \leq 5t\sqrt{6/L} \|\nabla f(x_0)\|,$$

where  $\xi_i \in (0, t)$  is by the mean value theorem. The desired result follows from taking  $t \rightarrow 0$ .  $\square$

## 1.2 Uniqueness

In this section we prove the uniqueness of the solution to (1.2).

**Lemma 1.6.** *For any initial point  $x_0 \in \mathbb{R}^n$ , ODE (1.2) with initial conditions  $X(0) = x_0, \dot{X}(0) = 0$  has at most one local solution near  $t = 0$ .*

Suppose on the contrary there are two solutions, namely,  $X$  and  $Y$  defined on  $(0, \alpha)$  for some  $\alpha > 0$ . Define  $\tilde{M}(t)$  to be the supremum of  $\|\dot{X}(u) - \dot{Y}(u)\|$  over  $u \in [0, t]$ , where  $t$  is between  $\epsilon$  and  $\alpha$ . To proceed, we need a simple auxiliary lemma.

**Lemma 1.7.** *For any  $t \in (0, \alpha)$  one has*

$$\|\nabla f(X(t)) - \nabla f(Y(t))\| \leq Lt\tilde{M}(t).$$

*Proof of Lemma 1.7.* By Lipschitz continuity of the gradient, one has

$$\begin{aligned} \|\nabla f(X(t)) - \nabla f(Y(t))\| &\leq L\|X(t) - Y(t)\| = L\left\|\int_0^t \dot{X}(u) - \dot{Y}(u)du + X(0) - Y(0)\right\| \\ &\leq L\int_0^t \|\dot{X}(u) - \dot{Y}(u)\|du \leq Lt\tilde{M}(t). \end{aligned}$$

□

*Proof of Lemma 1.6.* Similar to the proof of Lemma 1.4, one has

$$t^3(\dot{X}(t) - \dot{Y}(t)) = -\int_0^t u^3(\nabla f(X(u)) - \nabla f(Y(u)))du.$$

Applying Lemma 1.7 gives

$$t^3\|\dot{X}(t) - \dot{Y}(t)\| \leq \int_0^t Lu^4\tilde{M}(u)du \leq \frac{1}{5}Lt^5\tilde{M}(t),$$

which reads  $\|\dot{X}(t) - \dot{Y}(t)\| \leq Lt^2\tilde{M}(t)/5$ . Thus for any  $t' \leq t$  it is true that  $\|\dot{X}(t') - \dot{Y}(t')\| \leq Lt^2\tilde{M}(t)/5$ . Taking the supremum of  $\|\dot{X}(t') - \dot{Y}(t')\|$  over  $t' \in (0, t)$  gives  $\tilde{M}(t) \leq Lt^2\tilde{M}(t)/5$ . Therefore  $\tilde{M}(t) = 0$  for  $t < \min(\alpha, \sqrt{5/L})$ , which is equivalent to saying  $\dot{X} = \dot{Y}$  on  $[0, \min(\alpha, \sqrt{5/L})]$ . With the same initial value  $X(0) = Y(0) = x_0$  and the same gradient, we conclude that  $X$  and  $Y$  are identical on  $(0, \min(\alpha, \sqrt{5/L}))$ , a contradiction. □

*Proof of Theorem 2.1.* Lemma 1.1 together with Lemma 1.6 completes the proof of Theorem 2.1. □

## 2 Proof of Theorem 4.2

*Proof of Theorem 4.2.* The derivative of  $\tilde{\mathcal{E}}$  reads

$$\begin{aligned} \frac{d\tilde{\mathcal{E}}(t)}{dt} &= 3t^2(f(X) - f^*) + t^3\langle \dot{X}, \nabla f(X) \rangle + \frac{(2r-3)^2}{8} \left\langle X + \frac{2t}{2r-3}\dot{X} - x^*, \frac{4t^2}{2r-3}\ddot{X} + \frac{4rt}{2r-3}\dot{X} + X - x^* \right\rangle \\ &= 3t^2(f(X) - f^*) - \frac{(2r-3)t^2}{2} \langle X - x^*, \nabla f(X) \rangle + \frac{(2r-3)^2}{8} \|X - x^*\|^2 + \frac{(2r-3)t}{4} \langle \dot{X}, X - x^* \rangle. \end{aligned} \tag{2}$$

By convexity and strong convexity of  $f$ , the second term of the RHS of (2) meets

$$\frac{(2r-3)t^2}{2} \langle X - x^*, \nabla f(X) \rangle \geq \frac{(2r-3)t^2}{2} (f(X) - f^*) + \frac{\mu(2r-3)t^2}{4} \|X - x^*\|^2.$$

Since  $r \geq 4$ , substituting the above into (2) yields

$$\begin{aligned} \frac{d\tilde{\mathcal{E}}(t)}{dt} &\leq \left[ 3t^2 - \frac{(2r-3)t^2}{2} \right] (f(X) - f^*) - \frac{2(2r-3)\mu t^2 - (2r-3)^2}{8} \|X - x^*\|^2 + \frac{(2r-3)t}{8} \frac{d\|X - x^*\|^2}{dt} \\ &\leq -\frac{2(2r-3)\mu t^2 - (2r-3)^2}{8} \|X - x^*\|^2 + \frac{(2r-3)t}{8} \frac{d\|X - x^*\|^2}{dt}. \end{aligned}$$

Hence if  $t \geq t' \triangleq \sqrt{(2r-3)/(2\mu)}$ , we obtain

$$\frac{d\tilde{\mathcal{E}}(t)}{dt} \leq \frac{(2r-3)t}{8} \frac{d\|X - x^*\|^2}{dt}. \quad (3)$$

For  $t > t'$ , integrating (3) over  $(t', t)$  gives

$$\begin{aligned} \tilde{\mathcal{E}}(t) &\leq \tilde{\mathcal{E}}(t') + \frac{2r-3}{8}t\|X(t) - x^*\|^2 - \frac{2r-3}{8}t'\|X(t') - x^*\|^2 - \frac{2r-3}{8} \int_{t'}^t \|X(u) - x^*\|^2 du \\ &\leq \tilde{\mathcal{E}}(t') + \frac{2r-3}{8}t\|X(t) - x^*\|^2 \leq \tilde{\mathcal{E}}(t') + \frac{2r-3}{4\mu}t(f(X(t)) - f^*) \\ &\leq \tilde{\mathcal{E}}(t') + \frac{(2r-3)(r-1)^2\|x_0 - x^*\|^2}{8\mu t} \leq \tilde{\mathcal{E}}(t') + \frac{(2r-3)(r-1)^2\|x_0 - x^*\|^2}{8\mu t'}, \end{aligned} \quad (4)$$

where the second last inequality follows from Theorem 4.1. We can make use of  $\mathcal{E}(t')$  to bound  $\tilde{\mathcal{E}}(t')$  in (4). Indeed we have

$$\begin{aligned} \tilde{\mathcal{E}}(t') &= t'^3(f(X(t')) - f^*) + \frac{(2r-3)^2t'}{8}\|X(t') + \frac{2t'}{2r-3}\dot{X}(t') - x^*\|^2 \\ &\leq t'^3(f(X(t')) - f^*) + \frac{(2r-3)^2t'}{4}\left\|\frac{2r-2}{2r-3}X(t') + \frac{2t'}{2r-3}\dot{X}(t') - \frac{2r-2}{2r-3}x^*\right\|^2 \\ &\quad + \frac{(2r-3)^2t'}{4}\left\|\frac{1}{2r-3}X(t') - \frac{1}{2r-3}x^*\right\|^2 \\ &\leq (r-1)t'\mathcal{E}(t') + \frac{t'}{4}\|X(t') - x^*\|^2 \leq (r-1)^2t'\|x_0 - x^*\|^2 + \frac{(r-1)^2\|x_0 - x^*\|^2}{4\mu t'}, \end{aligned}$$

which combined with (4) yields

$$\tilde{\mathcal{E}}(t) \leq (r-1)^2t'\|x_0 - x^*\|^2 + \frac{(2r-1)(r-1)^2\|x_0 - x^*\|^2}{8\mu t'} = O\left(\frac{r^{\frac{5}{2}}\|x_0 - x^*\|^2}{\sqrt{\mu}}\right).$$

It completes the proof for  $t \geq \sqrt{(2r-3)/(2\mu)}$  by noting  $f(X(t)) - f^* \leq \tilde{\mathcal{E}}(t)/t^3$ , whereas for  $t < \sqrt{(2r-3)/(2\mu)}$  by Theorem 4.1 we have

$$f(X(t)) - f^* \leq \frac{(r-1)^2\|x_0 - x^*\|^2}{2t^2} \leq \frac{(r-1)^2\sqrt{\mu}\sqrt{(2r-3)/(2\mu)}}{2Cr^{\frac{5}{2}}} \frac{Cr^{\frac{5}{2}}\|x_0 - x^*\|^2}{t^3\sqrt{\mu}} \leq \frac{Cr^{\frac{5}{2}}\|x_0 - x^*\|^2}{t^3\sqrt{\mu}}.$$

□

### 3 Proof of Theorem 4.3

*Proof of Theorem 4.3.* In parallel to the proof of Theorem 4.1, we propose an energy function defined as

$$\mathcal{E}(k) = \frac{2(k+r-2)^2s}{r-1}(f(x_k) - f^*) + (r-1)\|z_k - x^*\|^2,$$

where  $z_k = (k+r-1)y_k/(r-1) - kx_k/(r-1)$ . Suppose we have

$$\mathcal{E}(k) + \frac{2s[(r-3)(k+r-2)+1]}{r-1}(f(x_{k-1}) - f^*) \leq \mathcal{E}(k-1). \quad (5)$$

Then it immediately yields the desired results by summing over (5). To be specific, by recursively applying (5) we see

$$\mathcal{E}(k) + \sum_{i=1}^k \frac{2s[(r-3)(i+r-2)+1]}{r-1}(f(x_{i-1}) - f^*) \leq \mathcal{E}(0) = \frac{2(r-2)^2s}{r-1}(f(x_0) - f^*) + (r-1)\|x_0 - x^*\|^2,$$

which is equivalent to

$$\mathcal{E}(k) + \sum_{i=1}^{k-1} \frac{2s[(r-3)(i+r-1)+1]}{r-1}(f(x_i) - f^*) \leq (r-1)\|x_0 - x^*\|^2. \quad (6)$$

Noting that the LHS of (6) is lower bounded by  $2s(k+r-2)^2(f(x_k) - f^*)/(r-1)$  gives the first desired inequality. With  $\mathcal{E}(k) \geq 0$ , the second one is obtained via taking the limit  $k \rightarrow \infty$  in (6) and replacing  $(r-3)(i+r-1)+1$  by  $(r-3)(i+r-1)$ .

To complete, we aim to establish (5) in the rest of the proof. For  $s \leq 1/L$  it is well-known in proximal gradient literature, for example [1], that

$$f(y - sG_s(y)) \leq f(x) + G_s(y)^T(y - x) - \frac{s}{2}\|G_s(y)\|^2 \quad (7)$$

for any  $x$  and  $y$ . Note that  $y_{k-1} - sG_s(y_{k-1})$  actually coincides with  $x_k$ . Summing of  $(k-1)/(k+r-2) \times (7)$  with  $x = x_{k-1}, y = y_{k-1}$  and  $(r-1)/(k+r-2) \times (7)$  with  $x = x^*, y = y_{k-1}$  gives

$$\begin{aligned} f(x_k) &\leq \frac{k-1}{k+r-2}f(x_{k-1}) + \frac{r-1}{k+r-2}f^* \\ &\quad + \frac{r-1}{k+r-2}G_s(y_{k-1})^T\left(\frac{k+r-2}{r-1}y_{k-1} - \frac{k-1}{r-1}x_{k-1} - x^*\right) - \frac{s}{2}\|G_s(y_{k-1})\|^2 \\ &= \frac{k-1}{k+r-2}f(x_{k-1}) + \frac{r-1}{k+r-2}f^* + \frac{(r-1)^2}{2s(k+r-2)^2}\left(\|z_{k-1} - x^*\|^2 - \|z_k - x^*\|^2\right), \end{aligned}$$

where we use  $z_{k-1} - s(k+r-2)G_s(y_{k-1})/(r-1) = z_k$ . Rearranging the above inequality with multiplying by  $2s(k+r-2)^2/(r-1)$  gives the desired (5).  $\square$

## 4 Proof of Theorem 5.2

**Remark 4.1.** Indeed the linear convergence of  $X^{\text{sr}}$  remains for generalized ODE (4.1) with  $r > 3$ . Only minor modifications in proof such as replacing  $u^3$  with  $u^r$  in the definition of  $I(t)$  in Lemma 4.1 are required to get analogous convergence rate for the speed restarting version of (4.1).

**Lemma 4.1.** The speed restarting time  $T$  obeys

$$T(x_0, f) \geq \frac{4}{5\sqrt{L}}.$$

*Proof.* Denote by  $M(t)$  the supremum of  $\|\dot{X}(u)\|/u$  over  $u \in (0, t]$  and

$$I(t) \triangleq \int_0^t u^3(\nabla f(X(u)) - \nabla f(x_0))du.$$

By the proof of Lemma 1.5 it is guaranteed that  $M$  defined above is finite.  $M$  is useful in that it gives a bound on the gradient of  $f$ :

$$\|\nabla f(X(t)) - \nabla f(x_0)\| \leq L\|X(t) - x_0\| = L\left\|\int_0^t \dot{X}(u)du\right\| \leq L\int_0^t u \frac{\|\dot{X}(u)\|}{u} du \leq \frac{LM(t)t^2}{2}. \quad (8)$$

By (8), it is easy to see that  $I$  can also be bounded via  $M$ :

$$\|I(t)\| \leq \int_0^t u^3 \|\nabla f(X(u)) - \nabla f(x_0)\| du \leq \int_0^t \frac{LM(u)u^5}{2} du \leq \frac{LM(t)t^6}{12}. \quad (9)$$

To fully facilitate these bounds, we need to bound  $M$  as

$$M(t) \leq \frac{\|\nabla f(x_0)\|}{4(1 - Lt^2/12)} \quad (10)$$

for any  $t < \sqrt{12/L}$ .

To this end, note that indeed ODE (1.2) is equivalent to  $d(t^3\dot{X}(t))/dt = -t^3\nabla f(X(t))$ , which by integration leads to

$$t^3\dot{X}(t) = -\frac{t^4}{4}\nabla f(x_0) - \int_0^t u^3(\nabla f(X(u)) - \nabla f(x_0))du = -\frac{t^4}{4}\nabla f(x_0) - I(t). \quad (11)$$

Dividing (11) by  $t^4$  and applying (9), we obtain

$$\frac{\|\dot{X}(t)\|}{t} \leq \frac{\|\nabla f(x_0)\|}{4} + \frac{\|I(t)\|}{t^4} \leq \frac{\|\nabla f(x_0)\|}{4} + \frac{LM(t)t^2}{12}.$$

Note that the RHS of the above is monotonically increasing in  $t$ . Hence by taking the supremum of the LHS over  $(0, t]$  we obtain

$$M(t) \leq \frac{\|\nabla f(x_0)\|}{4} + \frac{LM(t)t^2}{12},$$

which gives the desired (10) by rearranging the inequality for  $t < \sqrt{12/L}$ .

Having established (10), we proceed to lower bound  $T$  via studying  $\langle \dot{X}(t), \ddot{X}(t) \rangle$ . Dividing (11) by  $t^3$ , one has an expression for  $\dot{X}$ , which reads

$$\dot{X}(t) = -\frac{t}{4}\nabla f(x_0) - \frac{1}{t^3} \int_0^t u^3(\nabla f(X(u)) - \nabla f(x_0))du. \quad (12)$$

Differentiating the above, we also obtain an expression for  $\ddot{X}$ :

$$\ddot{X}(t) = -\nabla f(X(t)) + \frac{3}{4}\nabla f(x_0) + \frac{3}{t^4} \int_0^t u^3(\nabla f(X(u)) - \nabla f(x_0))du. \quad (13)$$

Using the two expressions for  $\dot{X}$  and  $\ddot{X}$  we will show that  $d\|\dot{X}\|^2/dt = 2\langle \dot{X}(t), \ddot{X}(t) \rangle > 0$  for  $0 < t < 4/(5\sqrt{L})$ . To this end, noting that (12) and (13) yield

$$\begin{aligned} \langle \dot{X}(t), \ddot{X}(t) \rangle &= \left\langle -\frac{t}{4}\nabla f(x_0) - \frac{1}{t^3}I(t), -\nabla f(X(t)) + \frac{3}{4}\nabla f(x_0) + \frac{3}{t^4}I(t) \right\rangle \\ &\geq \frac{t}{4}\langle \nabla f(x_0), \nabla f(X(t)) \rangle - \frac{3t}{16}\|\nabla f(x_0)\|^2 - \frac{1}{t^3}\|I(t)\| \left( \|\nabla f(X(t))\| + \frac{3}{2}\|\nabla f(x_0)\| \right) - \frac{3}{t^7}\|I(t)\|^2 \\ &\geq \frac{t}{4}\|\nabla f(x_0)\|^2 - \frac{t}{4}\|\nabla f(x_0)\|\|\nabla f(X(t)) - \nabla f(x_0)\| - \frac{3t}{16}\|\nabla f(x_0)\|^2 \\ &\quad - \frac{LM(t)t^3}{12} \left( \|\nabla f(X(t)) - \nabla f(x_0)\| + \frac{5}{2}\|\nabla f(x_0)\| \right) - \frac{L^2M(t)^2t^5}{48} \\ &\geq \frac{t}{16}\|\nabla f(x_0)\|^2 - \frac{LM(t)t^3\|\nabla f(x_0)\|}{8} - \frac{LM(t)t^3}{12} \left( \frac{LM(t)t^2}{2} + \frac{5}{2}\|\nabla f(x_0)\| \right) - \frac{L^2M(t)^2t^5}{48} \\ &= \frac{t}{16}\|\nabla f(x_0)\|^2 - \frac{LM(t)t^3}{3}\|\nabla f(x_0)\| - \frac{L^2M(t)^2t^5}{16}, \end{aligned}$$

where we use (9) and (8). To complete the proof, applying (10) in the above inequality yields

$$\langle \dot{X}(t), \ddot{X}(t) \rangle \geq \left( \frac{1}{16} - \frac{Lt^2}{12(1 - Lt^2/12)} - \frac{L^2t^4}{256(1 - Lt^2/12)^2} \right) \|\nabla f(x_0)\|^2 t \geq 0$$

for  $t < \min\{\sqrt{12/L}, 4/(5\sqrt{L})\} = 4/(5\sqrt{L})$ , where the positiveness follows from the fact that

$$\frac{1}{16} - \frac{Lt^2}{12(1 - Lt^2/12)} - \frac{L^2t^4}{256(1 - Lt^2/12)^2} > 0$$

for  $0 < t \leq 4/(5\sqrt{L})$ . □

Next we give a lemma which claims that the objective function decays by a constant through each speed restarting.

**Lemma 4.2.** *There is a universal constant  $C > 0$  such that*

$$f(X(T)) - f(x^*) \leq \left(1 - \frac{C\mu}{L}\right)(f(x_0) - f(x^*)).$$

*Proof.* By (11), (9) and (10) in Lemma 4.1, for  $t < \sqrt{12/L}$  one has

$$\|\dot{X}(t) + \frac{t}{4}\nabla f(x_0)\| = \frac{1}{t^3}\|I(t)\| \leq \frac{LM(t)t^3}{12} \leq \frac{L\|\nabla f(x_0)\|t^3}{48(1-Lt^2/12)},$$

which gives

$$0 \leq \frac{t}{4}\|\nabla f(x_0)\| - \frac{L\|\nabla f(x_0)\|t^3}{48(1-Lt^2/12)} \leq \|\dot{X}(t)\| \leq \frac{t}{4}\|\nabla f(x_0)\| + \frac{L\|\nabla f(x_0)\|t^3}{48(1-Lt^2/12)} \quad (14)$$

for  $t < \sqrt{12/L}$ . By Lemma 4.1  $d\|\dot{X}\|^2/dt \geq 0$  for  $0 < t < 4/(5\sqrt{L})$  because  $T \geq 4/(5\sqrt{L})$ . Hence for  $0 < t < 4/(5\sqrt{L})$  it yields that

$$\frac{df(X(t))}{dt} = -\frac{3}{t}\|\dot{X}\|^2 - \frac{1}{2}\frac{d}{dt}\|\dot{X}\|^2 \leq -\frac{3}{t}\|\dot{X}\|^2 \leq -\frac{3}{t}\left(\frac{t}{4}\|\nabla f(x_0)\| - \frac{L\|\nabla f(x_0)\|t^3}{48(1-Lt^2/12)}\right)^2 \leq -ct\|\nabla f(x_0)\|^2,$$

where  $c > 0$  is an absolute constant and the second last inequality follows from (14). Therefore we have

$$\begin{aligned} f\left(X\left(\frac{4}{5\sqrt{L}}\right)\right) - f(x_0) &\leq \int_0^{\frac{4}{5\sqrt{L}}} -cu\|\nabla f(x_0)\|^2 du \\ &= -\frac{c'}{L}\|\nabla f(x_0)\|^2 \leq -\frac{2c'\mu}{L}(f(x_0) - f^*), \end{aligned}$$

where the last step follows from the  $\mu$ -strong convexity of  $f$ . Above  $c' > 0$  is an absolute constant. Thus we have

$$f\left(X\left(\frac{4}{5\sqrt{L}}\right)\right) - f^* \leq \left(1 - \frac{2c'\mu}{L}\right)(f(x_0) - f^*).$$

Last, recall that  $f(X(t))$  decreases on  $(4/(5\sqrt{L}), T)$ , which finishes the proof by noting

$$f(X(T)) - f^* \leq f\left(X\left(\frac{4}{5\sqrt{L}}\right)\right) - f^* \leq \left(1 - \frac{2c'\mu}{L}\right)(f(x_0) - f^*).$$

□

To establish the linear convergence, we also need to ensure that  $T$  can not be too large. To this end, we give the following lemma.

**Lemma 4.3.** *The speed restarting time  $T$  satisfies*

$$T \leq \frac{4}{5\sqrt{L}} \exp \frac{C'L}{\mu}.$$

*Proof.* For  $4/(5\sqrt{L}) \leq t \leq T$ , we have

$$\frac{df(X(t))}{dt} \leq -\frac{3}{t}\|\dot{X}(t)\|^2 \leq -\frac{3}{t}\|\dot{X}(4/(5\sqrt{L}))\|^2,$$

which implies

$$\begin{aligned} f(X(T)) - f(x_0) &\leq f(X(T)) - f(X(4/(5\sqrt{L}))) \leq -\int_{\frac{4}{5\sqrt{L}}}^T \frac{3}{t}\|\dot{X}(4/(5\sqrt{L}))\|^2 dt \\ &= -3\|\dot{X}(4/(5\sqrt{L}))\|^2 \log \frac{5T\sqrt{L}}{4}. \end{aligned}$$

Hence we get an upper bound for  $T$  which reads

$$T \leq \frac{4}{5\sqrt{L}} \exp \left( \frac{f(x_0) - f(X(T))}{3\|\dot{X}(4/(5\sqrt{L}))\|^2} \right) \leq \frac{4}{5\sqrt{L}} \exp \left( \frac{f(x_0) - f^*}{3\|\dot{X}(4/(5\sqrt{L}))\|^2} \right). \quad (15)$$



Plugging  $t = 4/(5\sqrt{L})$  in (14) gives

$$\|\dot{X}(4/(5\sqrt{L}))\| \geq \frac{c}{\sqrt{L}} \|\nabla f(x_0)\| \quad (16)$$

for some universal constant  $c > 0$ . Substituting (16) in (15) yields

$$T \leq \frac{4}{5\sqrt{L}} \exp\left(\frac{L(f(x_0) - f^*)}{3c^2 \|\nabla f(x_0)\|^2}\right) \leq \frac{4}{5\sqrt{L}} \exp \frac{L}{6c^2 \mu}.$$

□

It readily gives the proof of Theorem 5.2 by combining Lemmas 4.2 and 4.3.

*Proof of Theorem 5.2.* According to Lemma 4.3, by time  $t$  there are at least  $n^* \triangleq \lfloor 5t\sqrt{L}e^{-C'L/\mu}/4 \rfloor$  restartings for  $X^{\text{sr}}$ . By Lemma 4.2 and monotonically decreasing of  $f$  before restarting, we have

$$\begin{aligned} f(X^{\text{sr}}(t)) - f(x^*) &\leq f(X^{\text{sr}}(\sum_{i=1}^{n^*} T_i)) - f(x^*) \\ &\leq (1 - \frac{C\mu}{L})(f(X^{\text{sr}}(\sum_{i=1}^{n^*-1} T_i)) - f(x^*)) \\ &\leq \dots \\ &\leq (1 - \frac{C\mu}{L})^{n^*} (f(x_0) - f(x^*)) \\ &\leq \exp(-\frac{C\mu n^*}{L})(f(x_0) - f(x^*)) \\ &\leq c_1(f(x_0) - f(x^*))e^{-c_2 t \sqrt{L}}, \end{aligned}$$

where  $c_1 = \exp(C\mu/L)$  and  $c_2 = 5C\mu e^{-C'\mu/L}/(4L)$ . □

## References

- [1] N. Parikh and S. Boyd. Proximal algorithms. In *Foundations and Trends in Optimization*, volume 1, pages 123–231. 2013.
